# Supplementary material for: Tunable laser interference lithography preparation of plasmonic nanoparticle arrays tailored for SERS
Source: Royal Society of Chemistry journal article supplement (doi:10.1039/c7nr08905h), 2018-01-01
Supplement: c7nr08905h1.pdf [file c7nr08905h1.pdf]

## Supporting Information to: Tunable laser interference lithography preparation of plasmonic nanoparticle arrays tailored for SERS

Nestor Gisbert Quilis<sup>a</sup>, Médéric Lequeux<sup>b,c</sup>, Priyamvada Venugopalan<sup>a</sup>, Imran Khan<sup>a,d</sup>, Wolfgang Knoll<sup>a</sup>, Souhir Boujday<sup>c</sup>, Marc Lamy de la Chapelle<sup>b,e</sup> and Jakub Dostalek<sup>a</sup>

<sup>a</sup> Biosensor Technologies, AIT-Austrian Institute of Technology GmbH, Muthgasse11, 1190 Vienna, Austria. E-mail: Jakub.dostalek@ait.ac.at

<sup>b</sup> Université Paris 13, Sorbonne Paris Cité, Laboratoire CSPBAT, CNRS, (UMR 7244), 74 rue Marcel Cachin, 93017 Bobigny, France.

<sup>c</sup> Sorbonne Universités, UPMC Univ Paris 6, CNRS, UMR 7197, Laboratoire de Réactivité de Surface, F75005 Paris, France.

<sup>d</sup> AIT- Austrian Institute of Technology, Center for Energy, Photovoltaic Systems, Giefinggasse 2, A-1210 Vienna, Austria

<sup>e</sup> Institut des Molécules et Matériaux du Mans (IMMM - UMR CNRS 6283), Le Mans Université, Avenue Olivier Messiaen, 72085 Le Mans cedex 9, France

After the LIL recording step, periodic particle arrays with sub-wavelength size are generated upon development of the positive photoresist, with the height of the features around 100 nm. The dry etching treatment with argon ion beams removes the gold from the areas non-protected with the resist pattern, reducing the height approximately 20 nm. Finally, an oxygen plasma treatment is applied in order to remove the residual of photoresist on top of the prepared metallic nanoparticle arrays. This last step, as can be seen from a cross-section obtained by atomic force microscopy (AFM) in Figure S1, effectively removes the organic resist yielding a final height about 55-60 nm. The time and the power of the oxygen plasma treatment are optimized to ensure removal of the resist while preventing the melting of the gold nanoparticles.

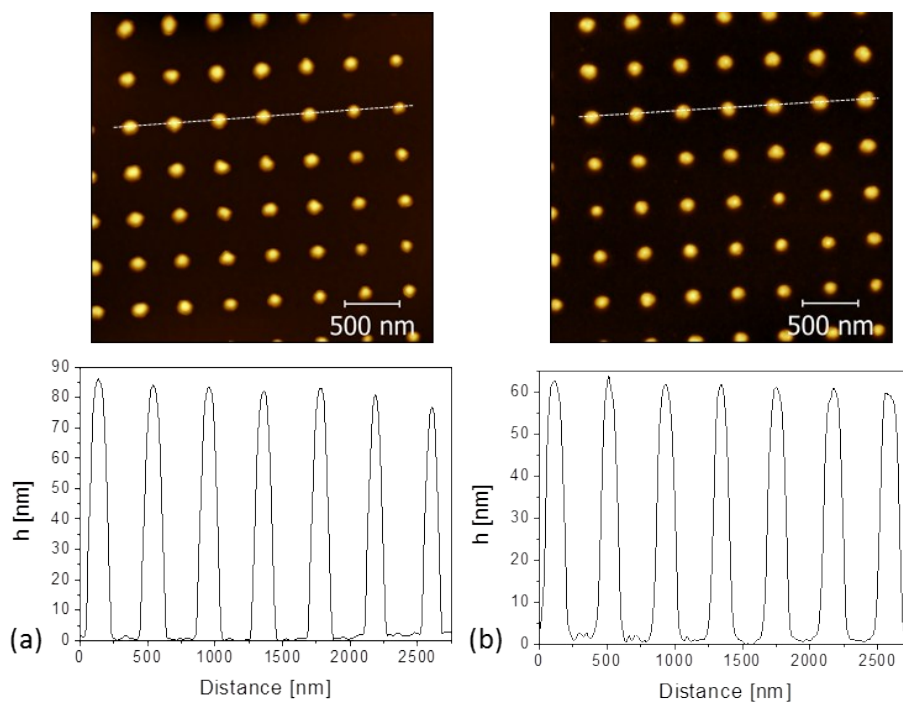

Figure S1. AFM image and modulation depth of the gold nanoparticles arrays after argon milling (a) and oxygen plasma (b) with  $\lambda=460$  nm and  $D=120$  nm.

The substrates S1 ( $\lambda=400$  nm and  $D=215$  nm) and S2 ( $\lambda=500$  nm and  $D=165$  nm) are tailored to exhibit a localized surface resonance in the vicinity of the laser line at 785 nm. Spectral changes in the transmission spectra for the sample S2 over the plasmonic substrate are measured with both a focused and collimated beam and given in the Figure S2. The study of the morphology performed by AFM for both substrates is outlined in Figure S3.

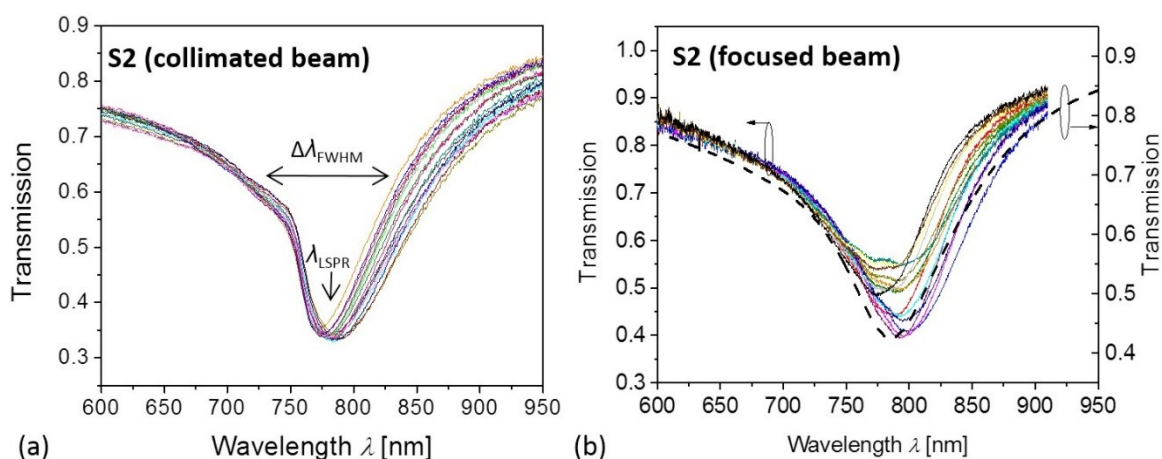

Figure S2. Comparison of the LSPR spectra measured on the substrate S1 on a) series of spots with a large 1 mm diameter arranged over  $1 \times 1$  cm with collimated beam and b) on with focused beam diameter  $3 \mu\text{m}$  scanned over  $200 \times 200 \mu\text{m}$ . Dashed line in b) shows transmission spectrum measured with large diameter beam on the same sample for comparison.

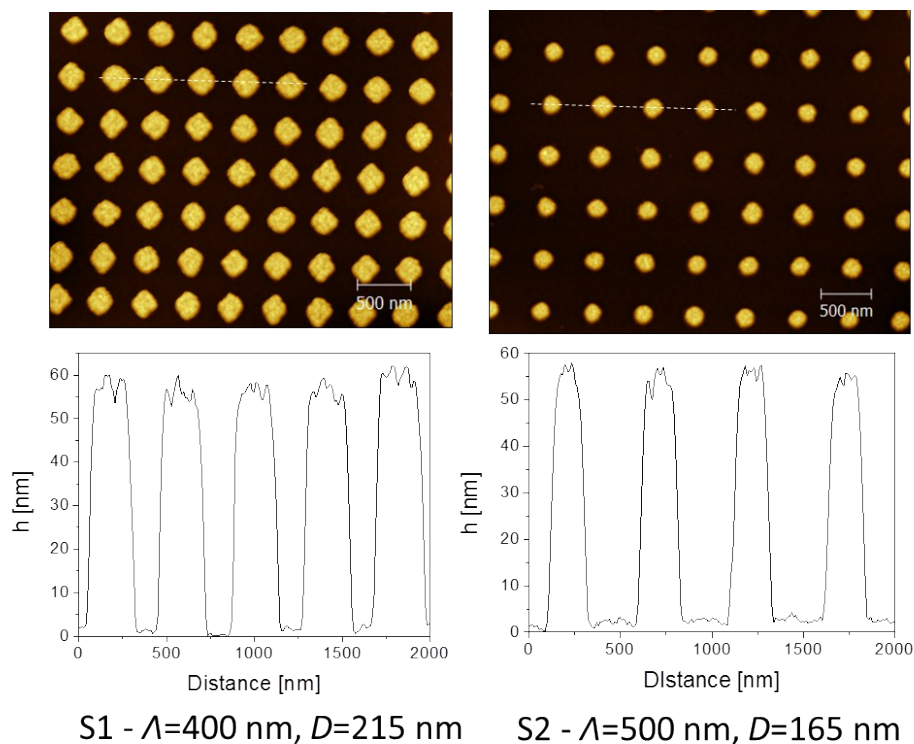

Figure S3. AFM observation of arrays of metallic nanoparticles carried by substrates S1 and S2.

SERS spectra were measured for 4-mercaptobenzoic acid, 4-aminothiophenol and 1,2-di(4-pyridyl)ethylene attached to a substrate with arrays of gold nanoparticles with  $\Lambda=500$  nm and  $D=165$  nm. These SERS measurements were performed in backscattering configuration at room temperature with  $\times 100$  lens and a laser beam at  $\lambda_L=785$  nm focused at a spot of  $1 \mu\text{m}$  in

diameter. The power of the laser beam at the spot was about 2.5  $\mu\text{W}$  and Raman spectrum was accumulated by 30 s. Artefacts corresponding to cosmic rays were removed and raw spectra were compensated for the background. As Figure S4 shows, all measured spectra show broad bands at around 1400  $\text{cm}^{-1}$  and 1900  $\text{cm}^{-1}$ , which are attributed to the glass substrate. 4-mercaptobenzoic acid shows three peaks at  $\Delta\lambda_{R1}=1065 \text{ cm}^{-1}$ ,  $\Delta\lambda_{R2}=1166 \text{ cm}^{-1}$  and  $\Delta\lambda_{R3}=1576 \text{ cm}^{-1}$  with the intensity of 1166, 127 and 886 counts, respectively. Structurally similar 4-aminothiophenol shows three peaks at  $\Delta\lambda_{R1}=1072 \text{ cm}^{-1}$ ,  $\Delta\lambda_{R1}=1164 \text{ cm}^{-1}$  and  $\Delta\lambda_{R2}=1573 \text{ cm}^{-1}$  with the intensity 1523, 185 and 1016 counts, respectively. 1,2-Di(4-pyridyl)ethylene shows three weaker peaks at  $\Delta\lambda_{R1}=1095 \text{ cm}^{-1}$ ,  $\Delta\lambda_{R2}=1600 \text{ cm}^{-1}$  and  $\Delta\lambda_{R2}=1632 \text{ cm}^{-1}$  with the intensity of 162, 169, and 137 counts, respectively. These observations agree with SERS spectra reported before for other plasmonic nanostructures.<sup>1-3</sup>

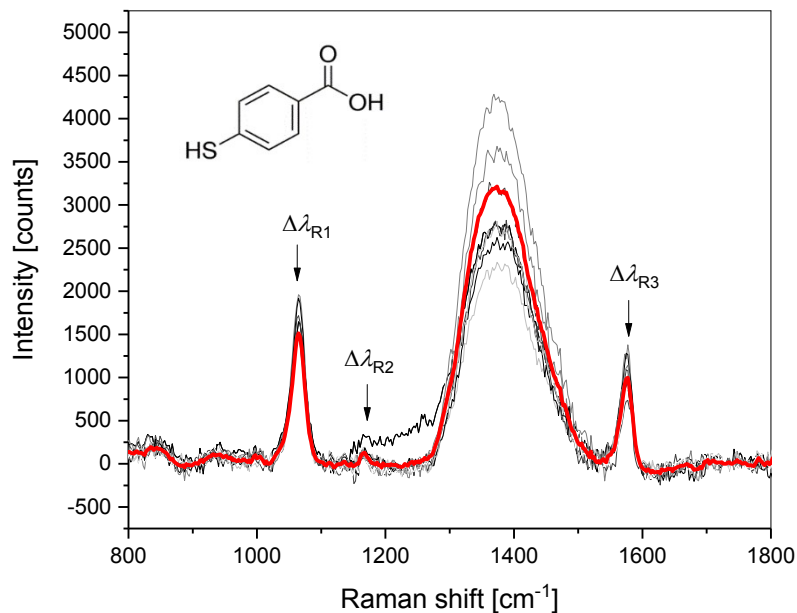

a)

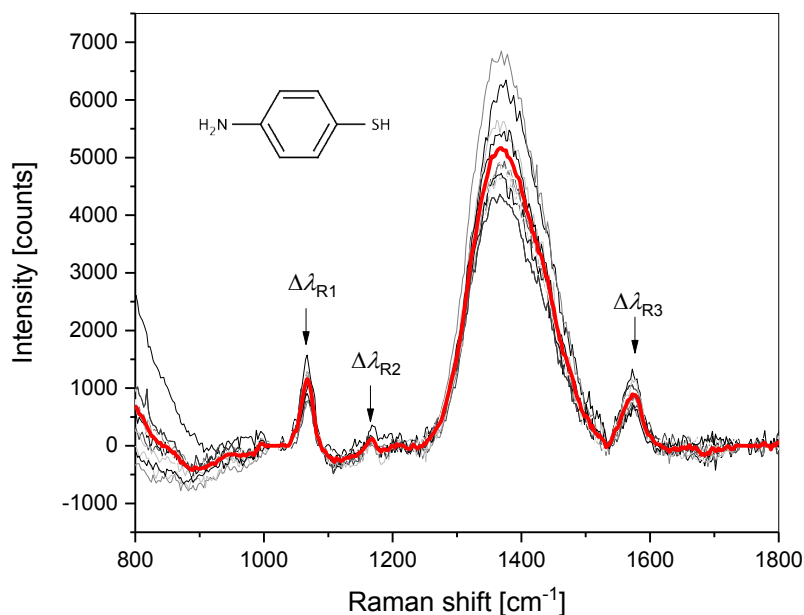

b)

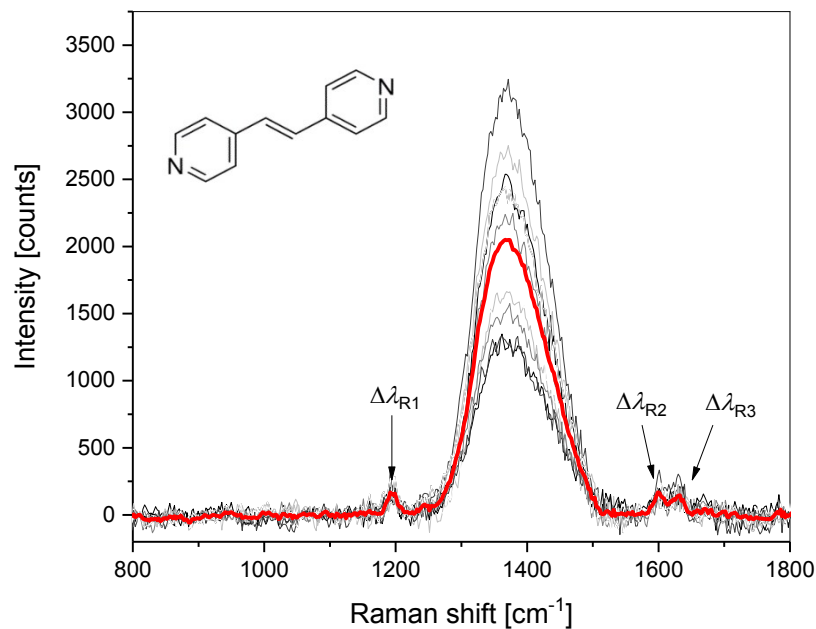

c)

Figure S4. SERS spectra of a) 4-Mercaptobenzoic acid, b) 4-Aminothiophenol and c) 1,2-Di(4-pyridyl)ethylene measured on 10 spots arranged on a substrate with  $\Lambda=500$  nm and  $D=165$  nm (solid red line represents averaged signal).

#### References:

1. Yang, W. H.; Hulteen, J.; Schatz, G. C.; VanDuyne, R. P., A surface-enhanced hyper-Raman and surface-enhanced Raman scattering study of trans-1,2-bis(4-pyridyl)ethylene adsorbed onto silver film over nanosphere electrodes. Vibrational assignments: Experiment and theory. *J. Chem. Phys.* **1996**, *104* (11), 4313-4323.
2. Michota, A.; Bukowska, J., Surface-enhanced Raman scattering (SERS) of 4-mercaptobenzoic acid on silver and gold substrates. *J. Raman Spectrosc.* **2003**, *34* (1), 21-25.
3. Hu, X. G.; Wang, T.; Wang, L.; Dong, S. J., Surface-enhanced Raman scattering of 4-aminothiophenol self-assembled monolayers in sandwich structure with nanoparticle shape dependence: Off-surface plasmon resonance condition. *J. Phys. Chem. C* **2007**, *111* (19), 6962-6969.
